# Supplementary material for: Implementation of a Delayed Prescribing Model to Reduce Antibiotic Prescribing for Suspected Upper Respiratory Tract Infections in a Hospital Outpatient Department, Ghana
Source: Antibiotics (Basel). 2020 Nov 4;9(11):773. doi: 10.3390/antibiotics9110773 (PMC7694150; doi:10.3390/antibiotics9110773)
Supplement: Supplementary file 1 [file antibiotics-09-00773-s001.pdf]

## Supplementary Materials

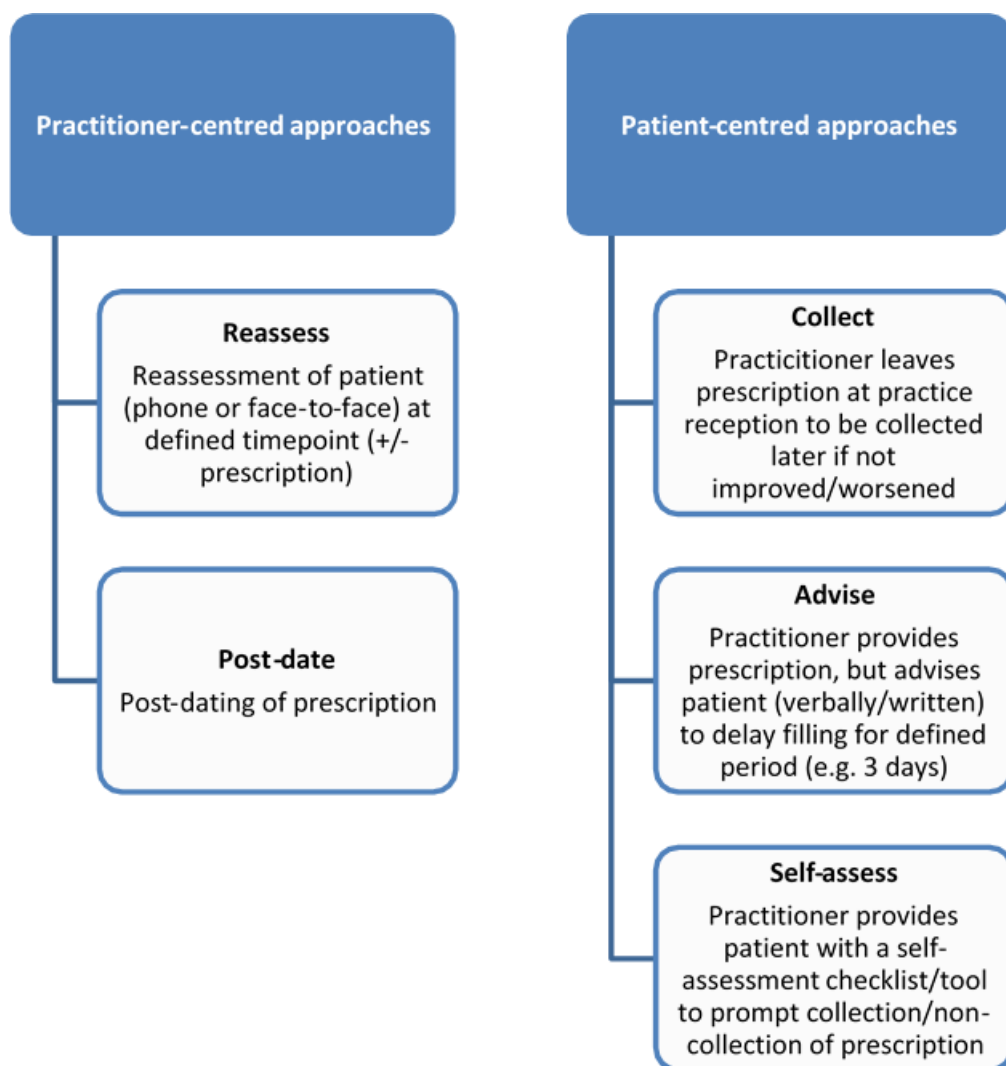

**Figure S1.** Typography of approaches to delayed antibiotic prescription.

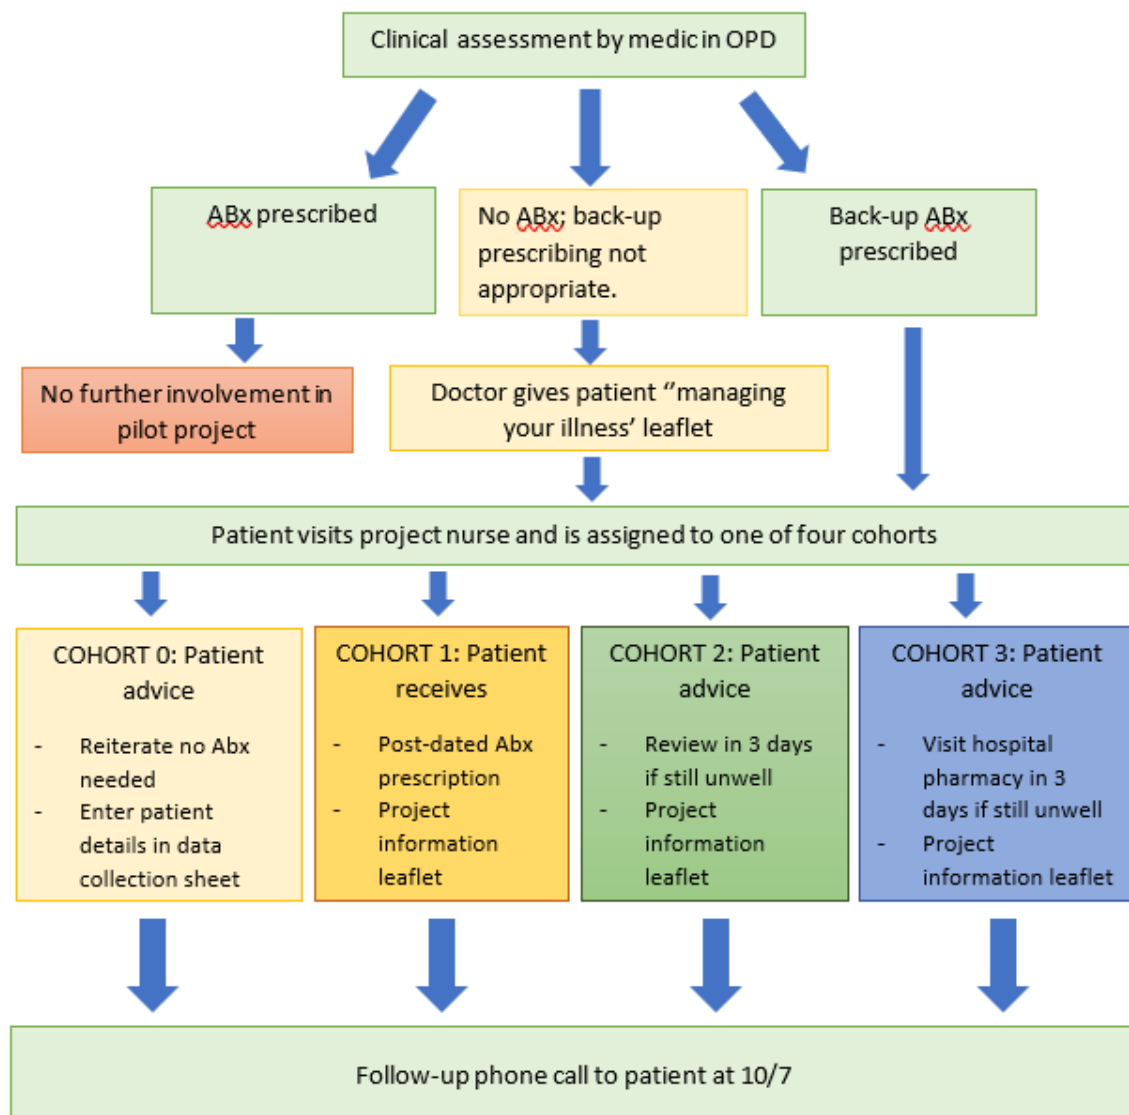

**Figure S2.** Patient pathways for project of delayed prescribing in LEKMA Hospital outpatients' department, Ghana.
